# Supplementary material
Source: publisher figshare collection journal article supplement (https://acs.figshare.com/ndownloader/files/9181348)
Supplement: Supplementary file 1 [file 9181348]

## Supporting information

### Simultaneous top and bottom perovskite interface engineering by fullerene surface modification of titanium dioxide as electron transport layer

*John Ciro, Santiago Mesa, Juan Felipe Montoya, José Ignacio Uribe, Rafael Betancur and  
Franklin Jaramillo\**

Centro de Investigación, Innovación y Desarrollo de Materiales – CIDEMAT, Facultad de  
Ingeniería, Universidad de Antioquia UdeA, Calle 70 No. 52-21, Medellín, Colombia.

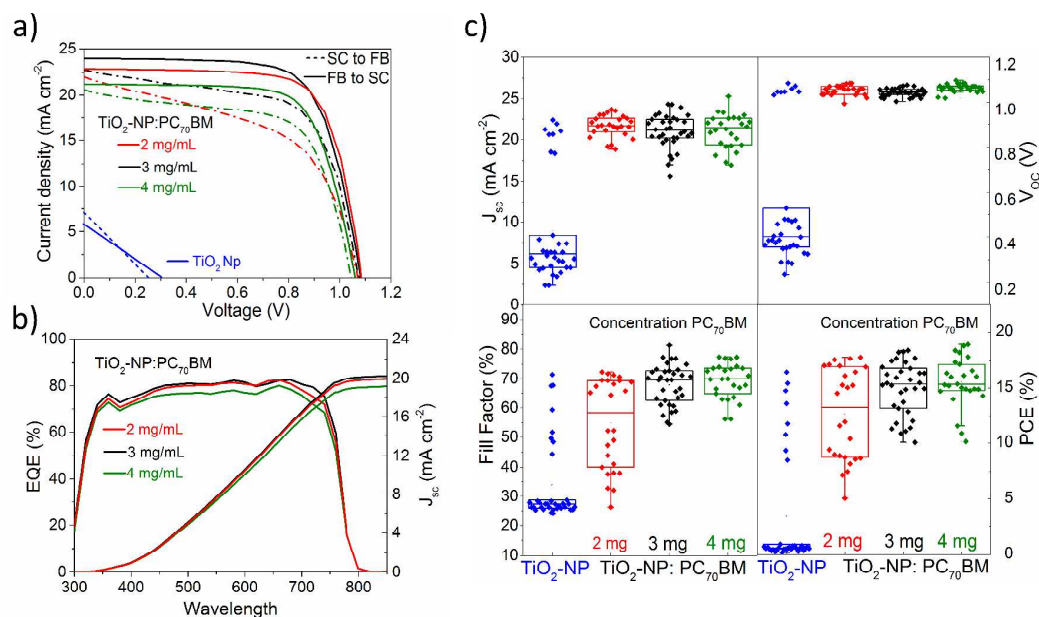

**Figure S1.** (a) Dependence of the resulting photovoltaic performance on the concentration of the PC<sub>70</sub>BM solution employed to modify the TiO<sub>2</sub>-NP layer. (b) Corresponding EQE and (c) Statistical dispersion of the obtained photovoltaic parameters.

**Table S1.** Photovoltaic parameters of the optimized solar cell devices depending on the PC<sub>70</sub>BM concentration. Best values achieved are presented in parenthesis. Average values correspond to 16 devices.

| [PC <sub>70</sub> BM]<br>(mg/mL)     | Scan<br>direction | J <sub>sc</sub><br>(mA/cm <sup>2</sup> ) | V <sub>oc</sub> (V) | FF (%)        | PCE (%)                 |
|--------------------------------------|-------------------|------------------------------------------|---------------------|---------------|-------------------------|
| <b>2</b>                             | FB to SC          | 22.46 ± 0.86                             | 1.07 ± 0.01         | 69.07 ± 2.36  | 16.62 ± 0.98<br>(17.68) |
|                                      | SC to FB          | 20.90 ± 1.25                             | 1.04 ± 0.02         | 42.54 ± 10.04 | 9.23 ± 2.30<br>(11.93)  |
| <b>3</b>                             | FB to SC          | 21.82 ± 1.58                             | 1.05 ± 0.02         | 72.98 ± 4.36  | 16.69 ± 1.21<br>(18.39) |
|                                      | SC to FB          | 20.22 ± 2.20                             | 1.05 ± 0.02         | 69.21 ± 5.94  | 15.08 ± 1.25<br>(15.27) |
| <b>4</b>                             | FB to SC          | 21.08 ± 1.79                             | 1.07 ± 0.02         | 71.60 ± 5.85  | 16.11 ± 2.33<br>(18.78) |
|                                      | SC to FB          | 21.02 ± 2.28                             | 1.06 ± 0.01         | 67.22 ± 6.03  | 14.95 ± 2.04<br>(15.20) |
| <b>0</b><br>(Bare TiO <sub>2</sub> ) | FB to SC          | 13.78 ± 8.27                             | 0.80 ± 0.33         | 44.10 ± 17.42 | 6.23 ± 6.47<br>(16.45)  |
|                                      | SC to FB          | 5.79 ± 1.65                              | 0.38 ± 0.07         | 26.59 ± 1.14  | 0.52 ± 0.16<br>(0.76)   |

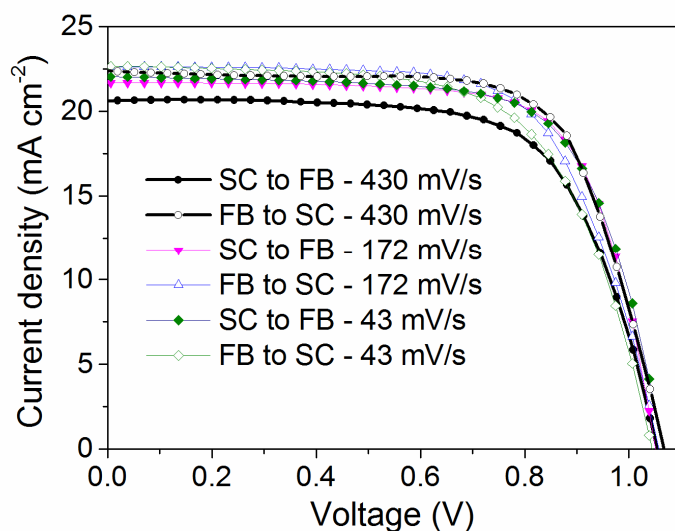

**Figure S2.** J-V curves of devices measured (concentration of PC<sub>70</sub>BM: 3 mg/mL) at different scan rates (43, 172 and 430 mV/s).

The table S2 Show the corresponding device parameters at different scan rates. The hysteresis has been quantified by calculating the hysteresis index (HI) as follows<sup>1</sup>:

$$HI = \frac{J_{FB \text{ to } SC} \left( \frac{V_{oc}}{2} \right) - J_{SC \text{ to } FB} \left( \frac{V_{oc}}{2} \right)}{J_{FB \text{ to } SC} \left( \frac{V_{oc}}{2} \right)}$$

Where  $J_{FB \text{ to } SC}$  and  $J_{SC \text{ to } FB}$  are the currents when half of the  $V_{oc}$  voltage is applied for reverse (from  $V_{oc}$  to zero) and for forward (from zero to  $V_{oc}$ ) voltage scans, respectively. A device without hysteresis presents a HI of zero, while higher values of HI indicate a more hysteresis. When we scan rates more slow, the HI is gradually reduced.

**Table S2.** The corresponding device parameters at different scan rates (43, 172 and 430 mV/s) and the quantified of its hysteresis.

| Scan direction      | Jsc (mA/cm <sup>2</sup> ) | V <sub>oc</sub> (V) | FF (%) | PCE (%) | HI    |
|---------------------|---------------------------|---------------------|--------|---------|-------|
| FB to SC - 430 mV/s | 22.39                     | 1.07                | 68.52  | 16.46   | 0.100 |
| SC to FB - 430 mV/s | 20.60                     | 1.04                | 68.54  | 14.69   |       |
| FB to SC - 172 mV/s | 22.02                     | 1.07                | 69.47  | 17.13   | 0.066 |
| SC to FB - 172 mV/s | 22.65                     | 1.04                | 65.46  | 16.09   |       |
| FB to SC - 43 mV/s  | 21.68                     | 1.07                | 70.87  | 16.41   | 0.020 |
| SC to FB - 43 mV/s  | 22.50                     | 1.07                | 66.28  | 15.97   |       |

a)

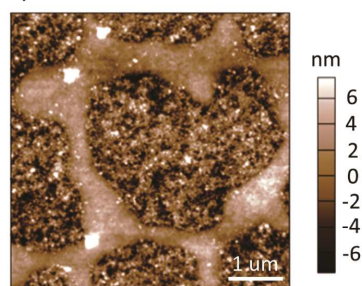

b)

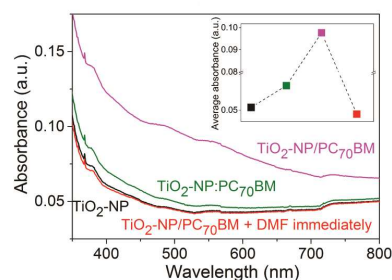

c)

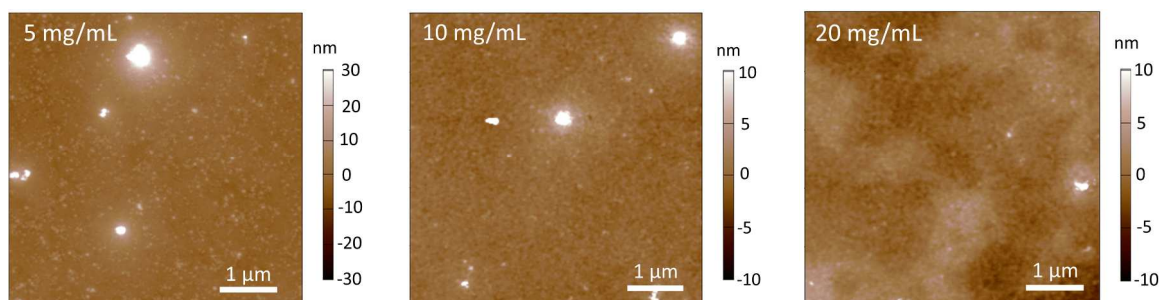

**Figure S3.** (a) Topography of  $\text{TiO}_2\text{-NP:PC}_{70}\text{BM}$  layer. (b) Optical absorption of the  $\text{TiO}_2\text{-NP}$  (black line) layer and the  $\text{TiO}_2\text{-NP/PC}_{70}\text{BM}$  (magenta line) bilayer. The interaction of the  $\text{TiO}_2\text{-NP/PC}_{70}\text{BM}$  bilayer with DMF was evaluated to corroborate if  $\text{PC}_{70}\text{BM}$  remains after depositing the perovskite. After 12 hours,  $\text{PC}_{70}\text{BM}$  is physisorbed to the  $\text{TiO}_2\text{-NP}$  and it is not fully removed by DMF (green line). In contrast,  $\text{PC}_{70}\text{BM}$  is fully removed when DMF is dripped immediately after the  $\text{PC}_{70}\text{BM}$  layer deposition (red line). Inset: Corresponding average absorbance in the 350-700 nm range. (c) Topography of  $\text{TiO}_2\text{-NP:PC}_{70}\text{BM}$  layers grown from precursor with solid concentration up to 20 mg/mL

Depositing  $\text{PC}_{70}\text{BM}$  on top of  $\text{TiO}_2\text{-NP}$  strongly enhanced the optical absorption between 350 and 700 nm (magenta and black lines in Figure S3, respectively). The  $\text{PC}_{70}\text{BM}$  layer was fully removed when the substrate interacted with DMF immediately after the  $\text{PC}_{70}\text{BM}$  deposition (red line). For that reason, the  $\text{PC}_{70}\text{BM}$  was allowed to interact with the np- $\text{TiO}_2$  layer during 12 hours before depositing the perovskite. In that case, the  $\text{PC}_{70}\text{BM}$  remained presumably physisorbed as evidenced by the green line in Figure S3.

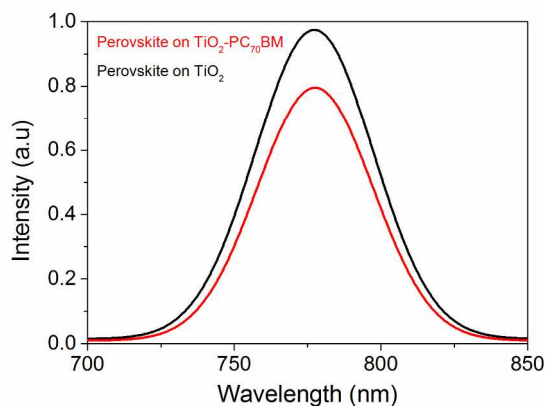

**Figure S4.** Steady-state photoluminescence (PL) spectra of the perovskite on  $\text{TiO}_2\text{-NP}$  and  $\text{TiO}_2\text{-NP:PC}_{70}\text{BM}$ .

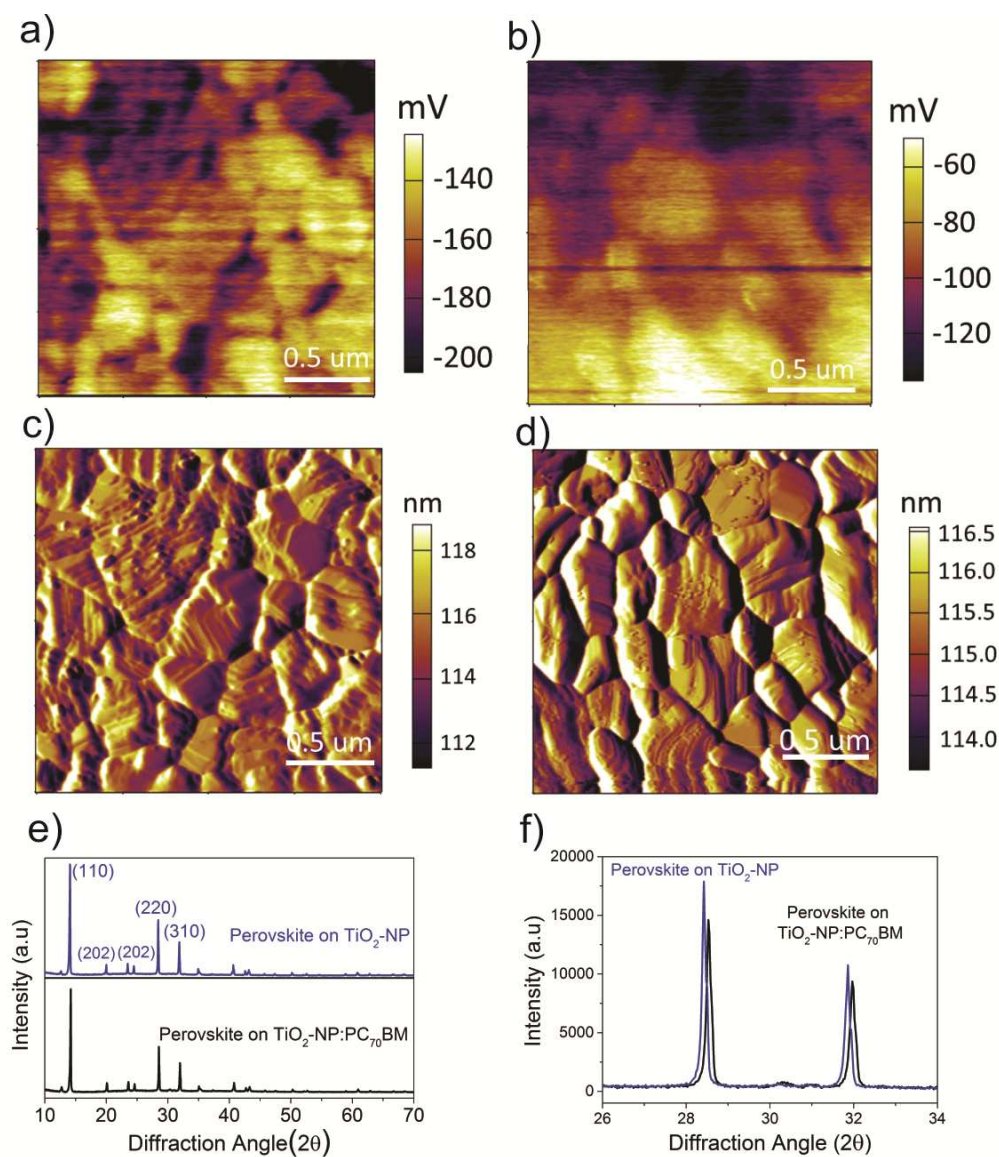

**Figure S5.** Electronic and morphologic properties of the grown perovskite depending on the underlying ETL. Contact voltage and retrace amplitude of the perovskite deposited on (a), (c)  $\text{TiO}_2\text{-NP:PC}_{70}\text{BM}$  layer and (b), (d)  $\text{TiO}_2\text{-NP}$  layer. (e) Diffractogram of the perovskite. (f) Zoom of the overlaid diffractograms.

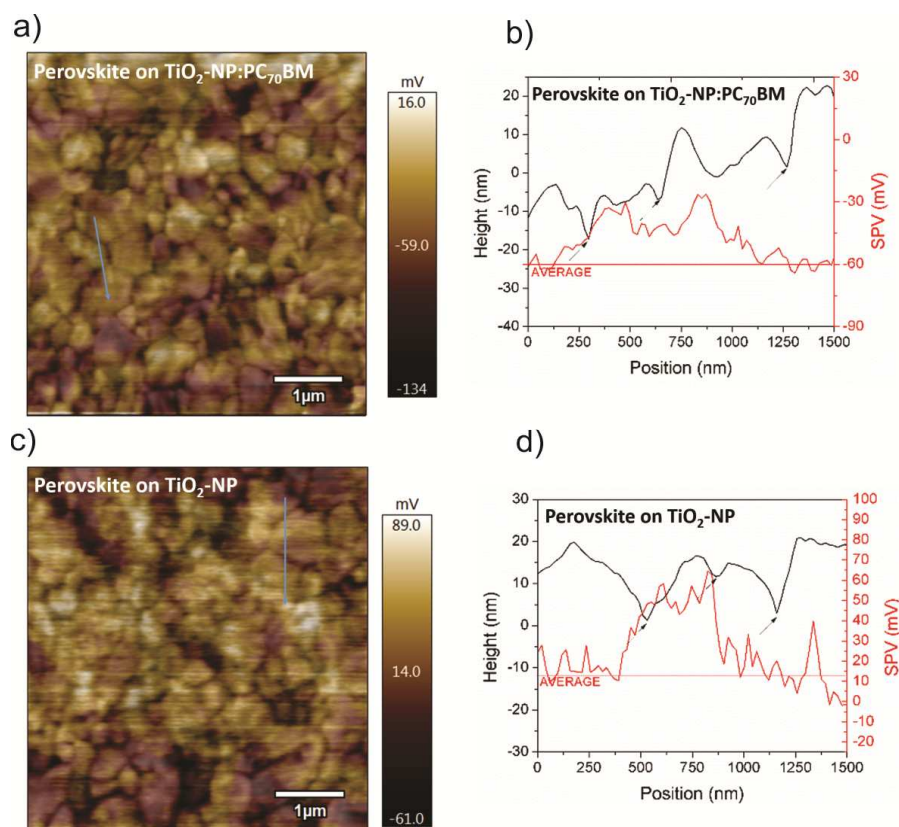

**Figure S6.** Overlaid SPV and topography maps and profiles for the perovskite grown on (a), (b)  $\text{TiO}_2\text{-NP:PC}_{70}\text{BM}$  and (c), (d)  $\text{TiO}_2\text{-NP}$  layers, respectively.

## References

- (1) Sanchez, R. S.; Gonzalez-pedro, V.; Lee, J.; Park, N.; Kang, Y. S.; Mora-sero, I.; Bisquert, J. Slow Dynamic Processes in Lead Halide Perovskite Solar Cells. Characteristic Times and Hysteresis. *J. Phys. Chem. Lett.* **2014**, 2357–2363.
